# Supplementary material
Source: MDPI journal article supplement (https://www.mdpi.com/2073-445X/4/1/157)
Supplement: s1 [file s1]

**OPEN ACCESS**

***land***

ISSN 2073-445X

www.mdpi.com/journal/land/

Supplementary Information

Examining Social Adaptations in a Volatile Landscape in Northern Mongolia via the Agent-Based Model *Ger Grouper. Land* 2014, *5*, 157-181

Julia K. Clark 1,†,* and Stefani A. Crabtree 2,3,†

1 Department of Anthropology, University of Pittsburgh, Pittsburgh, PA 15260, USA

2 Department of Anthropology, Washington State University, Pullman, WA 99164-49910, USA;
E-Mail: Stefani.crabtree@email.wsu.edu

3 Maison des Sciences de L’Homme et l’Environnement, Université de Frache-Comté,
25030 Besançon Cedex, France

**†**These authors contributed equally to this work.

***** Author to whom correspondence should be addressed; E-Mail: jkc24@pitt.edu;
Tel.: +1-406-529-6196.


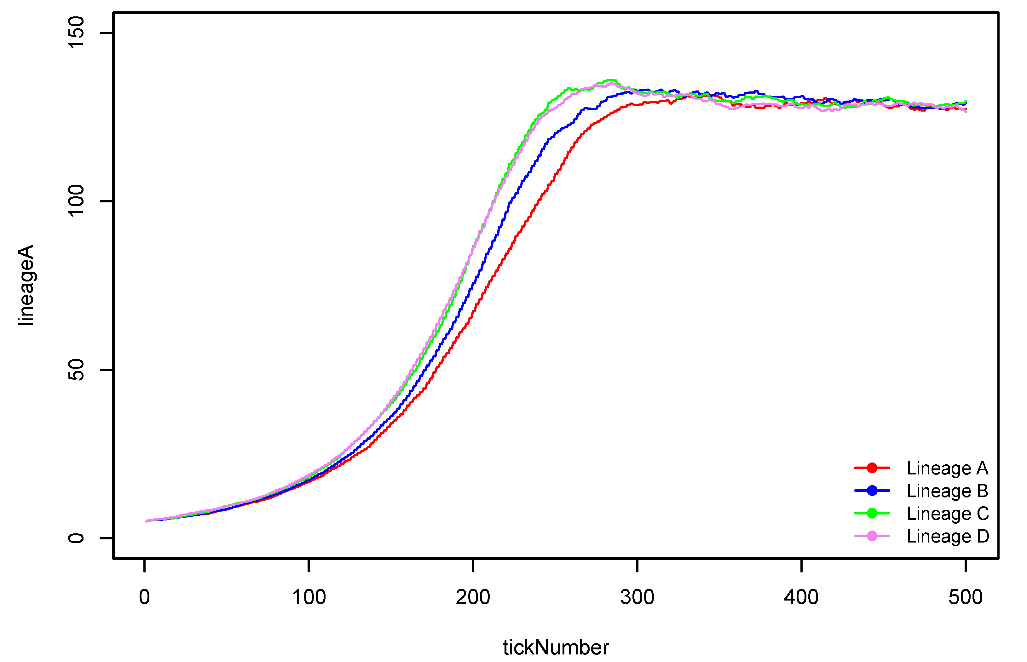


**Figure S1.** Means of each of the strategies for 0% patch variability. Means correspond to Row 1 of Figure 2. This figure reflects those runs when only one strategy was present in the simulation.


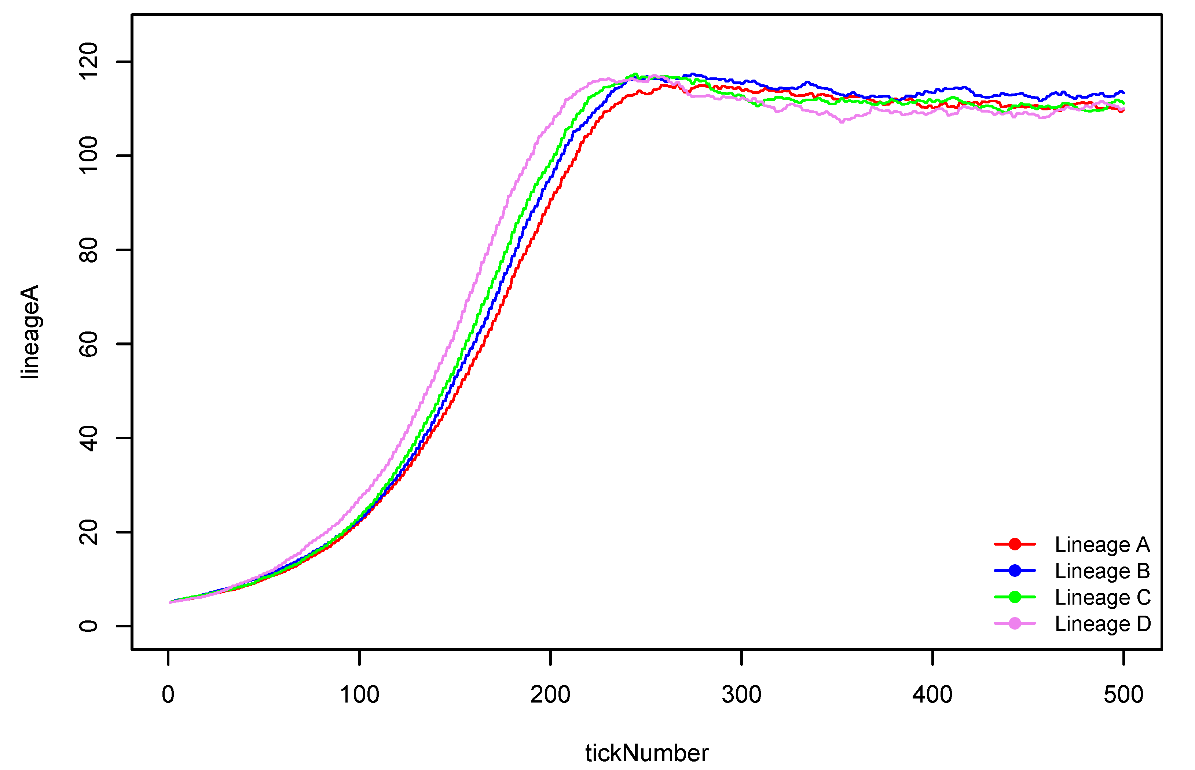


**Figure S2.** Means of each of the strategies for 5% patch variability. Means correspond to Row 2 of Figure 2. This figure reflects those runs when only one strategy was present in the simulation.


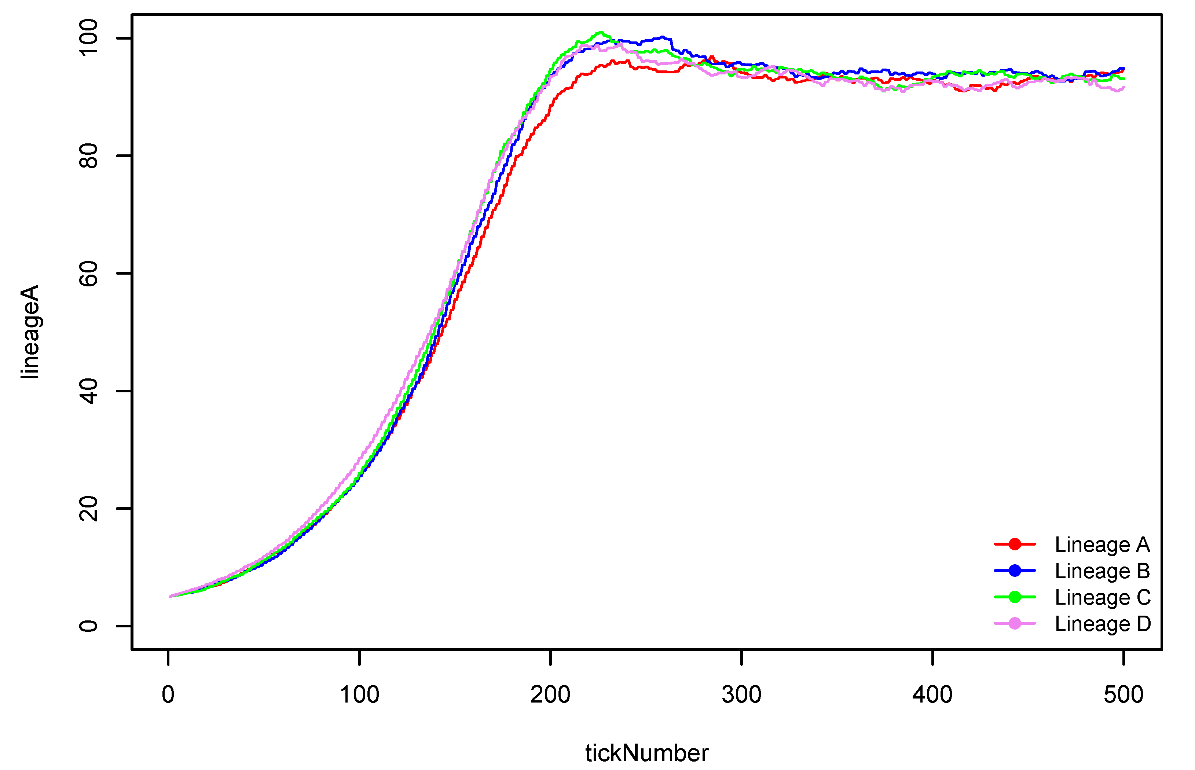


**Figure S3.** Means of each of the strategies for 10% patch variability. Means correspond to Row 3 of Figure 2. This figure reflects those runs when only one strategy was present in the simulation.


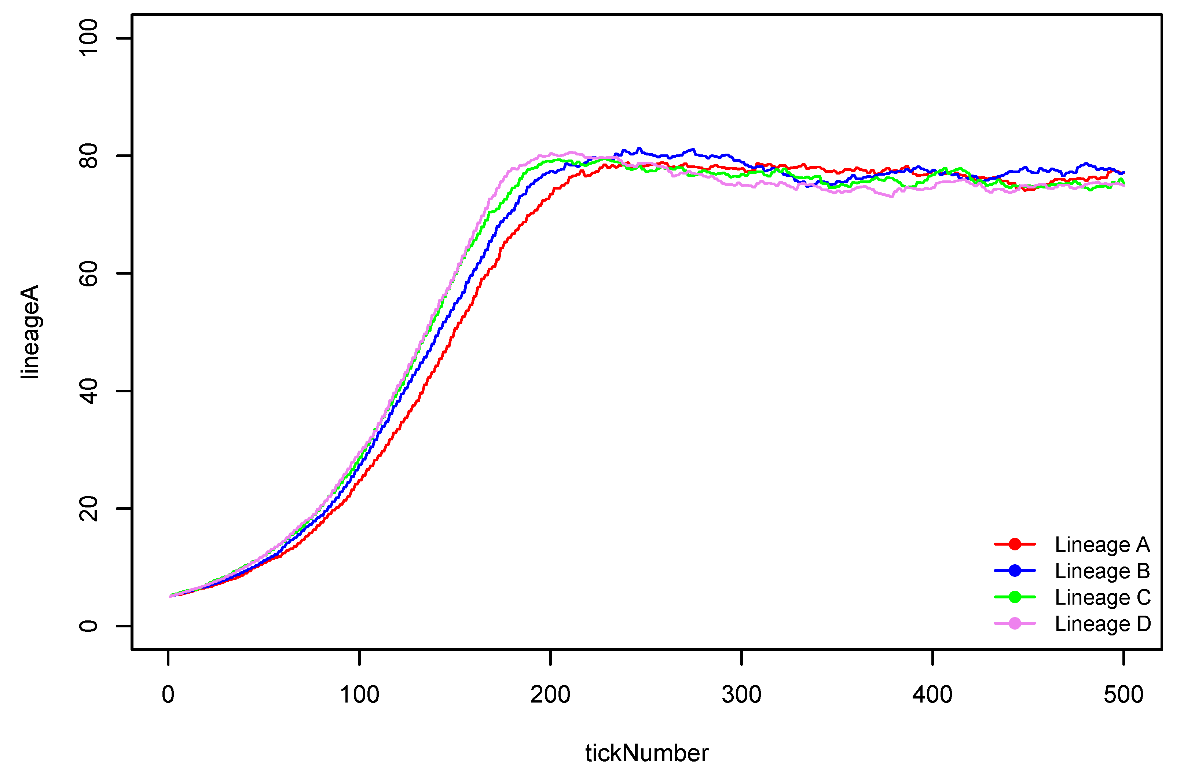


**Figure S4.** Means of each of the strategies for 15% patch variability. Means correspond to Row 4 of Figure 2. This figure reflects those runs when only one strategy was present in the simulation.


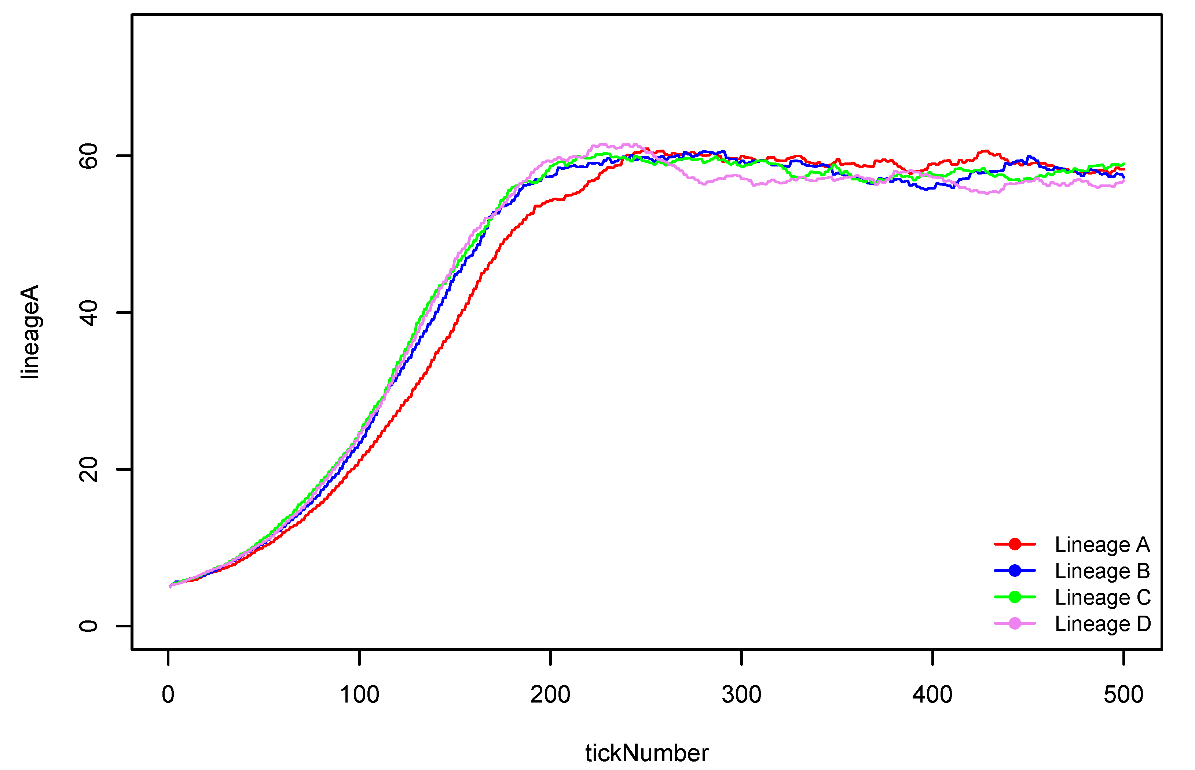


**Figure S5.** Means of each of the strategies for 20% patch variability. Means correspond to Row 5 of Figure 2. This figure reflects those runs when only one strategy was present in the simulation.


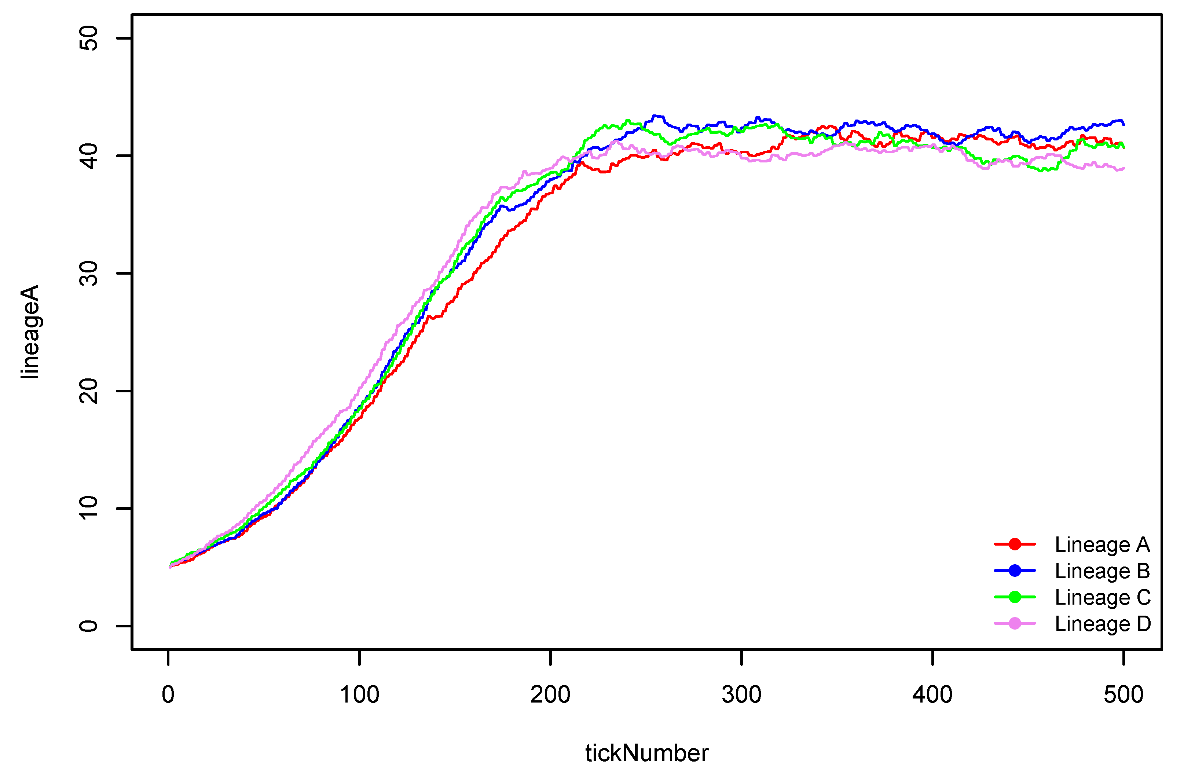


**Figure S6.** Means of each of the strategies for 25% patch variability. Means correspond to Row 6 of Figure 2. This figure reflects those runs when only one strategy was present in the simulation.


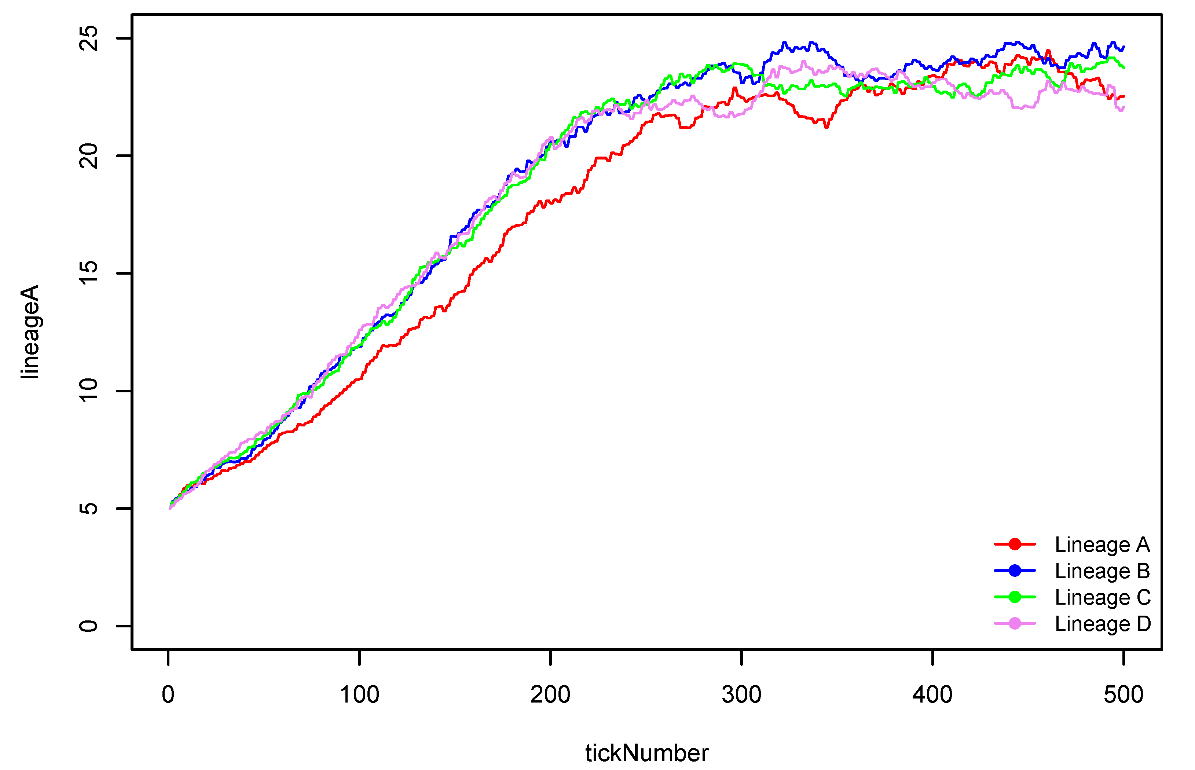


**Figure S7.** Means of each of the strategies for 30% patch variability. Means correspond to Row 7 of Figure 2. This figure reflects those runs when only one strategy was present in the simulation.

© 2015 by the authors; licensee MDPI, Basel, Switzerland. This article is an open access article distributed under the terms and conditions of the Creative Commons Attribution license (http://creativecommons.org/licenses/by/4.0/).
